# Supplementary material
Source: Springer Nature journal article supplement (https://www.springermedizin.de/resource/supplementary/12885_2012_3803_MOESM8_ESM.pdf/9464428)

Fig. 8

Testis case 1

Testis case 2

Testis case 3

Testis case 4

Testis case 5

Endometrial cancer

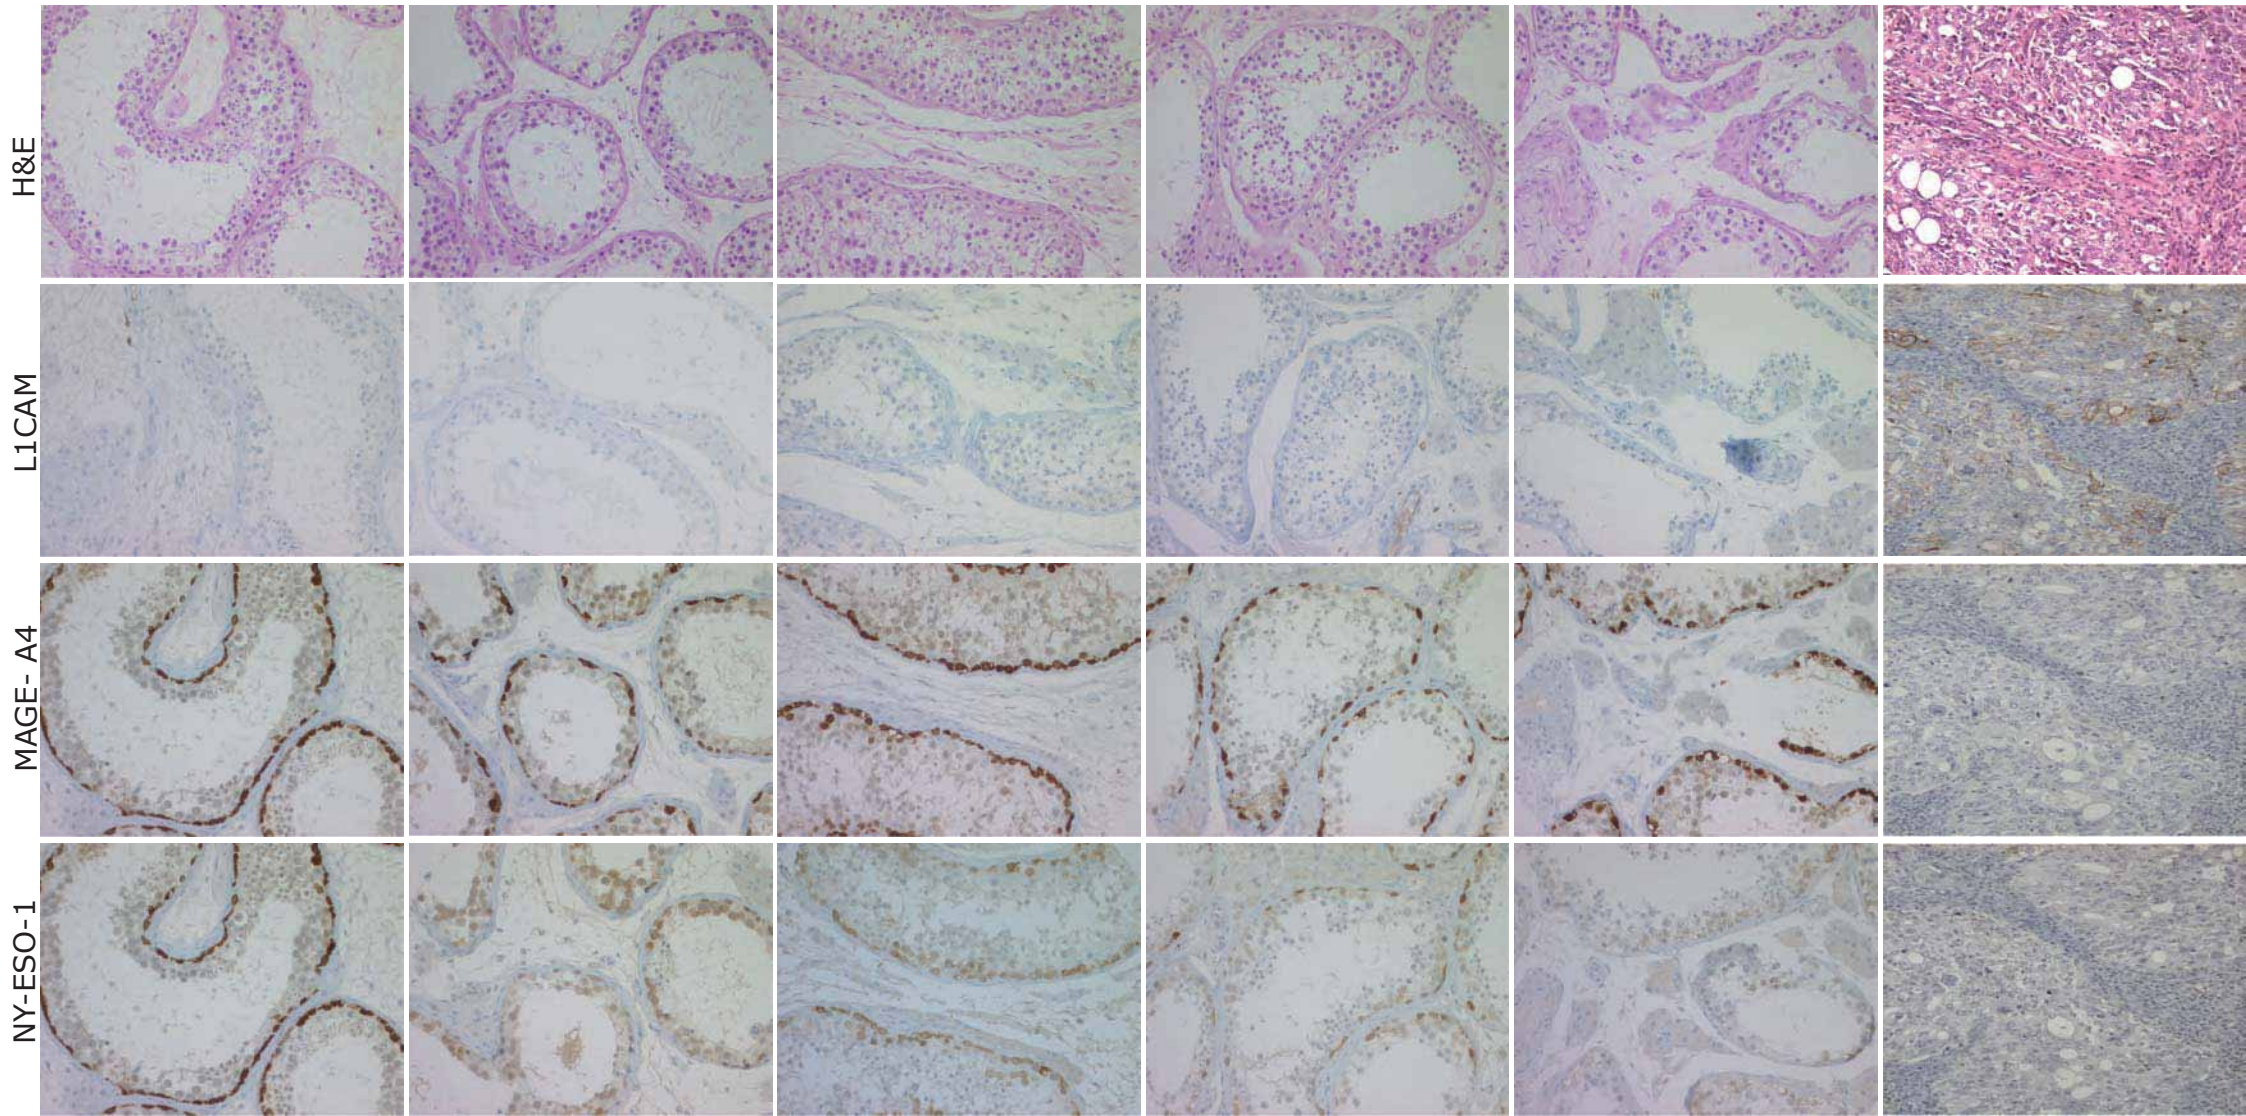

Supplement: MOESM8 [file 9464428]
